# Supplementary material for: Linkage isomerism in a face-centered cubic Cu6Cr8(CN)24 cluster with an S = 15 ground state
Source: Royal Society of Chemistry journal article supplement (doi:10.1039/b615141h), 2007-01-01
Supplement: b615141h.pdf [file b615141h.pdf]

**Supporting Information for**  
**Linkage Isomerism in a Face-Centered Cubic**  
 **$\text{Cu}_6\text{Cr}_8(\text{CN})_{24}$  Cluster with an  $S = 15$  Ground State**

T. David Harris and Jeffrey R. Long\*

*Department of Chemistry, University of California*

*Berkeley, CA 94270-1460 USA*

| <b>Contents</b>                             | <b>Page</b> |
|---------------------------------------------|-------------|
| Experimental Section                        | S2          |
| Structure of $[\text{TpCr}(\text{CN})_3]^-$ | S4          |
| Magnetization data for <b>2</b>             | S5          |

## Experimental Section

**General Considerations.** The compounds KTp<sup>1</sup> and CrCl<sub>3</sub>(THF)<sub>3</sub><sup>2</sup> were prepared following literature procedures. The compounds NaCN and Cu(ClO<sub>4</sub>)<sub>2</sub>·6H<sub>2</sub>O were purchased from Aldrich and used as received.

**Caution!** Although we have experienced no problems while working with them, perchlorate salts are potentially explosive and should be handled with care and only in small quantities.

**(Bu<sub>4</sub>N)[TpCrCl<sub>3</sub>]·2H<sub>2</sub>O.** This compound was prepared via a modified literature procedure.<sup>3</sup> Under a dinitrogen atmosphere, a colorless solution of KTp (1.8 g, 7.1 mmol) in 20 mL of acetonitrile was added dropwise via cannula to a stirred purple solution of CrCl<sub>3</sub>(THF)<sub>3</sub> (2.7 g, 7.1 mmol) in 30 mL of acetonitrile, resulting in a green slurry. After the slurry had stirred for 20 min, Bu<sub>4</sub>NCl (2.0 g, 7.2 mmol) was added, and the stirring was continued for 2 h. The reaction mixture was then filtered in air through Celite. The green filtrate was reduced to dryness *in vacuo*, and then sonicated under 20 mL of water to solidify the oily residue. The green solid was washed with successive aliquots of water (2 × 10 mL) and Et<sub>2</sub>O (3 × 10 mL), and dried *in vacuo* for 6 h to yield 3.0 g (65%) of product. Anal. Calcd for C<sub>28</sub>H<sub>50</sub>BCrN<sub>10</sub>O<sub>2</sub>: C, 46.22; H, 7.70; N, 15.10. Found: C, 45.85; H, 7.68; N, 15.64.

**(Bu<sub>4</sub>N)[TpCr(CN)<sub>3</sub>] (1).** Under a dinitrogen atmosphere, a green solution of (Bu<sub>4</sub>N)-[TpCrCl<sub>3</sub>]·2H<sub>2</sub>O (0.507 g, 0.781 mmol) in 8 mL of DMF was added to solid NaCN (0.298 g, 6.08 mmol) to give a green mixture. The mixture was stirred and heated at 150 °C for 3 days. During this period, the color of the reaction mixture changed from green to orange to yellow. The reaction mixture was reduced in volume to ca. 1 mL by heating at 70 °C under reduced pressure. In air, 40 mL of Et<sub>2</sub>O was added to the slurry to give a yellow precipitate. The solid was collected via filtration, and 5 mL of water was added to the yellow filtrate. With stirring, Bu<sub>4</sub>NCl (0.241 g, 0.867 mmol) was added to the mixture, resulting in the precipitation of additional yellow solid. The solid was collected by filtration, washed with successive aliquots

---

1 S. Trofimenko, *Inorg. Synth.*, 1970, **12**, 99.

2 J. Shamir, *Inorg. Chim. Acta*, 1989, **156**, 163.

3 R. Rojas, M. Valderrama and G. Wu, *Inorg. Chem. Commun.*, 2004, **7**, 1295.

of water ( $2 \times 5$  mL) and Et<sub>2</sub>O ( $3 \times 15$  mL), and dried *in vacuo* at 50 °C for 12 h to yield 0.307 g (67%) of product. Absorption spectrum (CH<sub>3</sub>CN):  $\lambda_{\text{max}}/\text{nm}$  420 ( $\epsilon/\text{L mol}^{-1} \text{ cm}^{-1}$  73). IR (ATR):  $\nu_{\text{max}}/\text{cm}^{-1}$  2114 (CN) and 2512 (BH). ES-MS<sup>-</sup> (CH<sub>3</sub>CN):  $m/z$  343 ([TpCr(CN)<sub>3</sub>]<sup>-</sup>).  $\mu_{\text{eff}} = 3.64 \mu_{\text{B}}$  at 300 K. Anal. Calcd for C<sub>28</sub>H<sub>46</sub>BCrN<sub>10</sub>: C, 57.45; H, 7.87; N, 23.94. Found: C, 57.31; H, 7.91; N, 23.86.

**[Tp<sub>8</sub>(H<sub>2</sub>O)<sub>6</sub>Cu<sub>6</sub>Cr<sub>8</sub>(CN)<sub>24</sub>](ClO<sub>4</sub>)<sub>4</sub>·7H<sub>2</sub>O·13THF (2).** Solid Cu(ClO<sub>4</sub>)<sub>2</sub>·6H<sub>2</sub>O (84 mg, 0.23 mmol) was added to a stirred yellow solution of **1** (94 mg, 0.16 mmol) in 6 mL of a 2:1 (v/v) mixture of acetonitrile and ethanol, resulting in the immediate formation of a green solution. After stirring for 5 min, the solution was filtered. Diffusion of THF vapor into the filtrate at room temperature afforded 67 mg (71%) of product as orange block-shaped crystals. IR (ATR):  $\nu_{\text{max}}/\text{cm}^{-1}$  2123 and 2167 (CN) and 2528 (BH). Anal. Calcd for C<sub>148</sub>H<sub>210</sub>B<sub>8</sub>Cl<sub>4</sub>Cr<sub>8</sub>Cu<sub>6</sub>-N<sub>72</sub>O<sub>42</sub>: C, 37.86; H, 4.51; N, 21.48. Found: C, 37.88; H, 4.49; N, 21.65.

**[Tp<sub>8</sub>(H<sub>2</sub>O)<sub>6</sub>Cu<sub>6</sub>Cr<sub>8</sub>(CN)<sub>24</sub>](ClO<sub>4</sub>)<sub>4</sub>·15H<sub>2</sub>O·13THF (3):** Solid Cu(ClO<sub>4</sub>)<sub>2</sub>·6H<sub>2</sub>O (82 mg, 0.22 mmol) was added to a stirred yellow solution of **1** (100 mg, 0.17 mmol) in 6 mL of a 2:1 (v/v) mixture of acetonitrile and ethanol chilled in an ice bath, resulting in the immediate formation of a green solution. After stirring for 5 min, the solution was filtered. Diffusion of THF vapor into the filtrate at 0 °C afforded 87 mg (84%) of **3** as green cube-shaped crystals. IR (ATR):  $\nu_{\text{max}}/\text{cm}^{-1}$  2183 (CN) and 2521 (BH). Anal. Calcd for C<sub>148</sub>H<sub>236</sub>B<sub>8</sub>Cl<sub>4</sub>Cr<sub>8</sub>Cu<sub>6</sub>N<sub>72</sub>O<sub>50</sub>: C, 36.73; H, 4.71; N, 20.84. Found: C, 36.59; H, 4.55; N, 20.89.

**Magnetic Measurements.** Magnetic data were collected using a Quantum Design MPMS-XL SQUID magnetometer. DC susceptibility data were collected at temperatures ranging from 5 to 300 K at fields of 500, 1000, and 5000 Oe. Magnetization data were collected at 2, 5 and 8 K, with applied fields ranging from 0 to 5 T. All data were corrected for diamagnetic contributions employing both a background subtraction and Pascal's constants. Samples were restrained with petroleum jelly to prevent torquing of the crystallites.

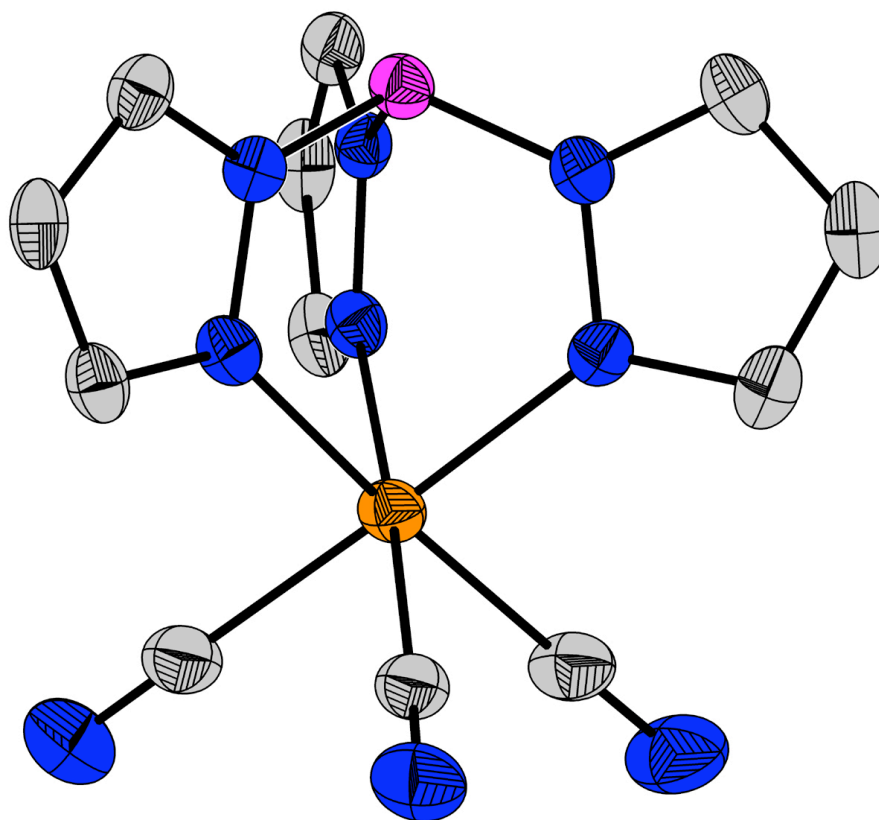

**Fig. S1** Structure of  $[\text{TpCr}(\text{CN})_3]^-$ , as observed in  $1 \cdot 3\text{H}_2\text{O}$ . Orange, pink, gray, and blue ellipsoids represent Cr, B, C, and N atoms, respectively; H atoms are omitted for clarity. Selected mean interatomic distances ( $\text{\AA}$ ) and angles (deg): Cr–C 2.072(4), Cr–N 2.056(3), C $\equiv$ N 1.154(5), N–Cr–N 86.4(1), C–Cr–C 90.1(1), Cr–C $\equiv$ N 177.0(4).

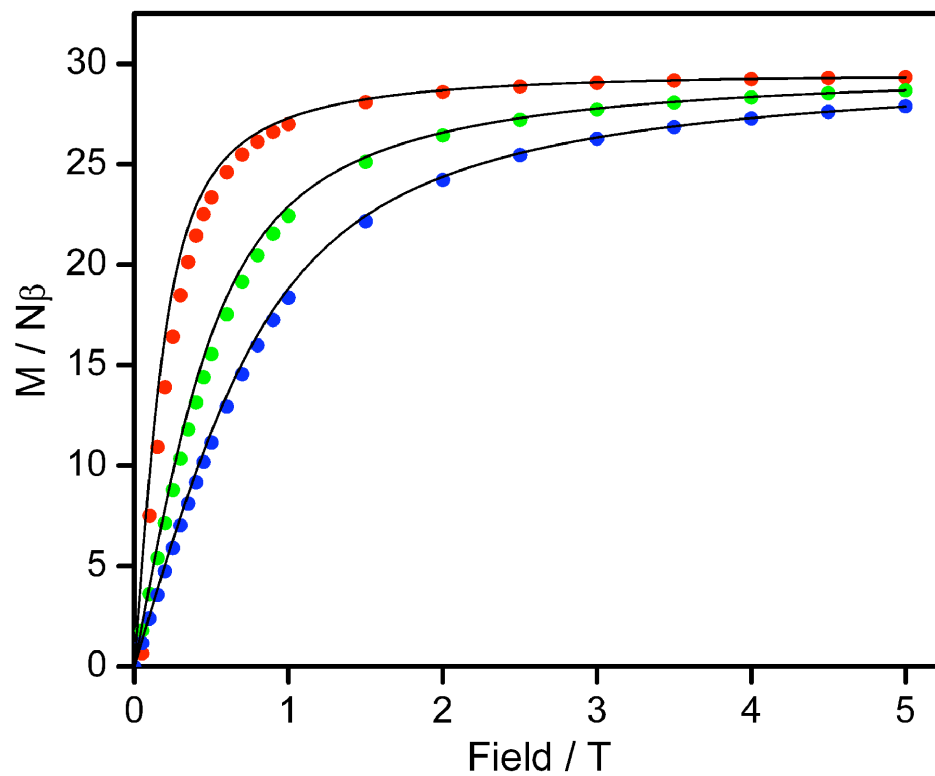

**Fig. S2** Magnetization data for **2** collected at 2 (red), 5 (green), and 8 (blue) K. The solid lines represent the Brillouin function for an  $S = 15$  molecule with  $g = 1.96$ .
